# Supplementary material
Source: PubMed Central journal article supplement (PMC2975213)
Supplement: supp_M110.139634_jbc.M110.139634-1.pdf [file supp_M110.139634_jbc.M110.139634-1.pdf]

## Supplemental Data

### Insights from selective non-phosphinic inhibitors of MMP-12 tailored to a S<sub>1</sub>' loop canonical conformation.

Laurent Devel<sup>¶</sup>, Sandra Garcia<sup>¶</sup>, Fabrice Beau<sup>¶</sup>, Dimitris Georgiadis<sup>‡</sup>, Bertrand Czarny<sup>¶</sup>, Evelyne Lajeunesse<sup>¶</sup>, Laura Vera<sup>¶</sup>, Enrico A. Stura<sup>¶</sup>, Vincent Dive<sup>¶\*</sup>

From the <sup>¶</sup> CEA, Commissariat à l'Energie Atomique, Service d'Ingénierie Moléculaire de Protéines (SIMOPRO), CE-Saclay, 91191 Gif/Yvette, Cedex, France and <sup>‡</sup> Laboratory of Organic Chemistry, Department of Organic Chemistry, University of Athens, Panepistimiopolis, Zografou, 15771 Athens, Greece

Address correspondence to : Dr V. Dive, CEA, Commissariat à l'Energie Atomique, Service d'Ingénierie Moléculaire de Protéines (SIMOPRO), 152, CE-Saclay, 91191 Gif/Yvette, Cedex, France, Tel : 33 1 69083585, Fax : 33 1 69089071, [vincent.dive@cea.fr](mailto:vincent.dive@cea.fr)

#### Table of Contents

|                                                                                               |            |
|-----------------------------------------------------------------------------------------------|------------|
| <b>1) Supplemental Data.....</b>                                                              | <b>p2</b>  |
| <b>Table S1:</b> Crystallization conditions and data collection statistics .....              | p2         |
| <b>Table S2:</b> Structure, name and analytical data of compounds <b>5</b> to <b>36</b> ..... | p3         |
| <b>Table S3:</b> Ki values (nM) of compounds <b>4</b> to <b>36</b> towards a set of MMPs..... | p9         |
| <b>2) Supplemental Experimental procedures.....</b>                                           | <b>p11</b> |
| <b>3) Supplemental references.....</b>                                                        | <b>p26</b> |

## 1) Supplemental Data

**Table S1:** Crystallization conditions and data collection statistics

| Data set                            | Compound (5)                                                      | Compound (9)                                                                      | Compound (14)                                            | Compound (36)                                                                     |
|-------------------------------------|-------------------------------------------------------------------|-----------------------------------------------------------------------------------|----------------------------------------------------------|-----------------------------------------------------------------------------------|
| PDB code                            | 3LIL                                                              | 3LIR                                                                              | 3LJG                                                     | 3LIK                                                                              |
| Crystallisation conditions          | 21% w/w PEG 10,000<br>200 M imidazole malate<br>pH 8.5<br>at 20°C | 21% w/w PEG 10,000<br>100 mM NaCl<br>200 mM imidazole malate<br>pH 8.5<br>at 20°C | 22% w/w PEG 3,350<br>100 mM glycine<br>pH 8.0<br>at 20°C | 25% w/w PEG 10,000<br>100 mM NaCl<br>200 mM imidazole malate<br>pH 8.5<br>at 20°C |
| Synchrotron                         | ESRF                                                              | ESRF                                                                              | Soleil                                                   | ESRF                                                                              |
| Beamline                            | ID14-2                                                            | ID23-1                                                                            | Proxima-1                                                | ID14-2                                                                            |
| Space group and cell parameters (Å) | P2 <sub>1</sub> 2 <sub>1</sub> 2<br>68.8 62.7 37.6                | P2 <sub>1</sub> 2 <sub>1</sub> 2<br>69.1 62.8 37.6                                | P2 <sub>1</sub> 2 <sub>1</sub> 2<br>69.0 63.2 37.6       | P2 <sub>1</sub> 2 <sub>1</sub> 2<br>68.4 62.9 36.6                                |
| Resolution (Å)                      | 1.8 (1.9)                                                         | 1.9 (2.0)                                                                         | 1.31 (1.35)                                              | 1.8 (1.9)                                                                         |
| Unique reflections                  | 15718                                                             | 13419                                                                             | 39828                                                    | 13458                                                                             |
| R <sub>sym</sub> <sup>b</sup> (%)   | 9                                                                 | 12.8                                                                              | 10.7                                                     | 8                                                                                 |
| <I/σ(I)>                            | 14.6                                                              | 12.8                                                                              | 13.6                                                     | 15.2                                                                              |
| Completeness (%)                    | 99.99                                                             | 99.5                                                                              | 100                                                      | 89.1                                                                              |
| R <sub>work</sub> <sup>c</sup> (%)  | 15.36 (16.59)                                                     | 16.05 (18.14)                                                                     | 17.38 (29.70)                                            | 15.74 (18.48)                                                                     |
| R <sub>free</sub> <sup>d</sup> (%)  | 18.96 (19.57)                                                     | 20.69 (23.93)                                                                     | 19.40 (27.22)                                            | 20.93 (25.8)                                                                      |
| <b>RMSD</b>                         |                                                                   |                                                                                   |                                                          |                                                                                   |
| Bond length (Å)                     | 0.008                                                             | 0.008                                                                             | 0.006                                                    | 0.007                                                                             |
| Bond angle (°)                      | 1.166                                                             | 1.167                                                                             | 1.250                                                    | 1.044                                                                             |
| <b>Ramachandran plot</b>            |                                                                   |                                                                                   |                                                          |                                                                                   |
| Most favoured region                | 159                                                               | 161                                                                               | 160                                                      | 159                                                                               |
| Additional region                   | 3                                                                 | 1                                                                                 | 2                                                        | 3                                                                                 |

<sup>a</sup>Values in parantheses are for the highest resolution shell.

$$^b R_{\text{sym}} = \frac{\sum_{hkl} \sum_i |I_i - \langle I \rangle|}{\sum_{hkl} \sum_i I_i}$$

$$^c R_{\text{work}} = \frac{\sum_{hkl} ||F_{\text{obs}}| - k|F_{\text{calc}}||}{\sum_{hkl} |F_{\text{obs}}|}$$

<sup>d</sup>R<sub>free</sub> was calculated using 5% of data excluded from refinement.

**Table S2:** Structure, name and analytical data of compounds **5** to **36**

|          | Structure | Name                                                                                                                                     | Analytical data                                                                                                                                                                                                                                                                                                                                                                                                                                                                                                                                                                           |
|----------|-----------|------------------------------------------------------------------------------------------------------------------------------------------|-------------------------------------------------------------------------------------------------------------------------------------------------------------------------------------------------------------------------------------------------------------------------------------------------------------------------------------------------------------------------------------------------------------------------------------------------------------------------------------------------------------------------------------------------------------------------------------------|
| <b>5</b> |           | ( <i>S</i> )-5-amino-4-(( <i>S</i> )-4-carboxy-2-(3-(3-(3'-chlorobiphenyl-4-yl)isoxazol-5-yl)propanamido)butanamido)-5-oxopentanoic acid | Ascentis Express : $t_R=5,40\text{min}$<br>$\epsilon_{272}=31915 \text{ M}^{-1} \cdot \text{cm}^{-1}$<br>$^1\text{H NMR}$ (DMSO $d_6$ ): $\delta$ 1.75 (m, 2H), 1.89 (m, 2H), 2,23 (m, 4H), 2,62 (m, 2H), 3.03 (m, 2H), 4,21 (m, 2H), 6.86 (s, 1H), 7.11 (s, 1H), 7.32 (s, 1H), 7.51 (m, 2H), 7.72 (d, 1H, $J=7.25\text{Hz}$ ), 7.84 (m, 3H), 7.94 (d, 2H, $J=8.25\text{Hz}$ ), 8.00 (d, 1H, $J=7.75\text{Hz}$ ), 8.28 (d, 1H, $J=7.25\text{Hz}$ ),<br>HRMS $m/z$ for $\text{C}_{28}\text{H}_{30}\text{ClN}_4\text{O}_8$ ( $\text{M}+\text{H}^+$ ) $^+$ , calcd 585.1752, found 585.1733. |
| <b>6</b> |           | ( <i>S</i> )-5-amino-4-(3-(3-(3'-chlorobiphenyl-4-yl)isoxazol-5-yl)propanamido)-5-oxopentanoic acid                                      | Ascentis Express: $t_R=5.69\text{min}$<br>$\epsilon_{272}=18230 \text{ M}^{-1} \cdot \text{cm}^{-1}$<br>HRMS $m/z$ for $\text{C}_{23}\text{H}_{23}\text{ClN}_3\text{O}_5$ ( $\text{M}+\text{H}^+$ ) $^+$ , calcd 456.1326, found 456.1330.                                                                                                                                                                                                                                                                                                                                                |
| <b>7</b> |           | 3-(3-(3'-chloro-[1,1'-biphenyl]-4-yl)isoxazol-5-yl)propanamide                                                                           | Ascentis Express: $t_R=6.18\text{min}$<br>MS $m/z$ for $\text{C}_{23}\text{H}_{23}\text{ClN}_3\text{O}_5$ ( $\text{M}+\text{H}^+$ ) $^+=327.1$ , ( $\text{M}+\text{Na}^+$ ) $^+=349.1$ .                                                                                                                                                                                                                                                                                                                                                                                                  |
| <b>8</b> |           | ( <i>S</i> )-5-amino-4-(( <i>S</i> )-2-(3-(3-(biphenyl-4-yl)isoxazol-5-yl)propanamido)-4-carboxybutanamido)-5-oxopentanoic acid          | Ascentis Express: $t_R=4,82\text{min}$<br>$\epsilon_{273}=35600 \text{ M}^{-1} \cdot \text{cm}^{-1}$<br>HRMS $m/z$ for $\text{C}_{28}\text{H}_{31}\text{N}_4\text{O}_8$ ( $\text{M}+\text{H}^+$ ) $^+$ , calcd 551.2142, found 551.2135.                                                                                                                                                                                                                                                                                                                                                  |
| <b>9</b> |           | ( <i>S</i> )-5-amino-4-(( <i>S</i> )-4-carboxy-2-(3-(3-phenylisoxazol-5-yl)propanamido)butanamido)-5-oxopentanoic acid                   | Ascentis Express: $t_R=2,89\text{min}$<br>$\epsilon_{241}=11950 \text{ M}^{-1} \cdot \text{cm}^{-1}$<br>HRMS $m/z$ for $\text{C}_{22}\text{H}_{27}\text{N}_4\text{O}_8$ ( $\text{M}+\text{H}^+$ ) $^+$ ,                                                                                                                                                                                                                                                                                                                                                                                  |

|    |                                                                                     |                                                                                                                                          |                                                                                                                                                                                                                                                                                                                                                                                                                                                                                                                                                                                        |
|----|-------------------------------------------------------------------------------------|------------------------------------------------------------------------------------------------------------------------------------------|----------------------------------------------------------------------------------------------------------------------------------------------------------------------------------------------------------------------------------------------------------------------------------------------------------------------------------------------------------------------------------------------------------------------------------------------------------------------------------------------------------------------------------------------------------------------------------------|
|    |                                                                                     | acid                                                                                                                                     | calcd 475.1828, found 475.1823.                                                                                                                                                                                                                                                                                                                                                                                                                                                                                                                                                        |
| 10 | 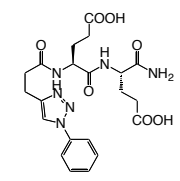   | ( <i>S</i> )-5-amino-4-(( <i>S</i> )-4-carboxy-2-(3-(1-phenyl-1 <i>H</i> -1,2,3-triazol-4-yl)propanamido)butanamido)-5-oxopentanoic acid | Ascentis Express: $t_R=2,23\text{min}$<br>$\epsilon_{248}=4827\text{ M}^{-1}\cdot\text{cm}^{-1}$<br>HRMS $m/z$ for $\text{C}_{21}\text{H}_{27}\text{N}_6\text{O}_7$ ( $\text{M}+\text{H}^+$ ) <sup>+</sup> ,<br>calcd 475.1941, found 475.1953.                                                                                                                                                                                                                                                                                                                                        |
| 11 |    | ( <i>S</i> )-5-amino-4-(( <i>S</i> )-4-carboxy-2-(3-(5-phenylisoxazol-3-yl)propanamido)butanamido)-5-oxopentanoic acid                   | Ascentis Express: $t_R=3,27\text{min}$<br>$\epsilon_{263}=23750\text{ M}^{-1}\cdot\text{cm}^{-1}$<br>HRMS $m/z$ for $\text{C}_{22}\text{H}_{27}\text{N}_4\text{O}_8$ ( $\text{M}+\text{H}^+$ ) <sup>+</sup> ,<br>calcd 475.1829, found 475.1843.                                                                                                                                                                                                                                                                                                                                       |
| 12 |    | ( <i>S</i> )-5-amino-4-(( <i>S</i> )-4-carboxy-2-(3-(5-phenyl-1,2,4-oxadiazol-3-yl)propanamido)butanamido)-5-oxopentanoic acid           | Ascentis Express: $t_R=3,32\text{min}$<br>$\epsilon_{253}=17391\text{ M}^{-1}\cdot\text{cm}^{-1}$<br>HRMS $m/z$ for $\text{C}_{21}\text{H}_{26}\text{N}_5\text{O}_8$ ( $\text{M}+\text{H}^+$ ) <sup>+</sup> ,<br>calcd 476.1782, found 476.1794.                                                                                                                                                                                                                                                                                                                                       |
| 13 |   | ( <i>S</i> )-5-amino-4-(( <i>S</i> )-4-carboxy-2-(3-(2-phenylthiazol-4-yl)propanamido)butanamido)-5-oxopentanoic acid                    | Ascentis Express: $t_R=3,23\text{min}$<br>$\epsilon_{294}=13992\text{ M}^{-1}\cdot\text{cm}^{-1}$<br>HRMS $m/z$ for $\text{C}_{22}\text{H}_{27}\text{N}_4\text{O}_7\text{S}$ ( $\text{M}+\text{H}^+$ ) <sup>+</sup> ,<br>calcd 491.1601, found 491.1613.                                                                                                                                                                                                                                                                                                                               |
| 14 |  | ( <i>S</i> )-5-amino-4-(( <i>S</i> )-2-(3-(biphenyl-4-yl)propanamido)-4-carboxybutanamido)-5-oxopentanoic acid                           | Ascentis Express: $t_R=4,26\text{min}$<br>$\epsilon_{253}=22540\text{ M}^{-1}\cdot\text{cm}^{-1}$<br><sup>1</sup> H NMR (DMSO $d_6$ ): $\delta$ 1.71 (m, 2H), 1.87 (m, 2H), 2.22 (m, 4H), 2.51 (m, 2H), 2.85 (m, 2H), 4.21 (m, 2H), 7.12 (s, 1H), 7.33 (m, 4H), 7.45 (t, 2H, $J=7.25\text{Hz}$ ) 7.56 (d, 2H, $J=7.25\text{Hz}$ ), 7.63 (d, 2H, $J=7.25\text{Hz}$ ), 7.96 (d, 1H, $J=7.75\text{Hz}$ ), 8.13 (d, 1H, $J=7.5\text{Hz}$ ).<br>HRMS $m/z$ for $\text{C}_{25}\text{H}_{30}\text{N}_3\text{O}_7$ ( $\text{M}+\text{H}^+$ ) <sup>+</sup> ,<br>calcd 484.2084, found 484.2084. |
| 15 |  | ( <i>S</i> )-5-amino-4-(( <i>S</i> )-2-(3-(3'-aminobiphenyl-4-yl)propanamido)-4-carboxybutanamido)-5-oxopentanoic acid                   | Ascentis Express: $t_R=1,93\text{min}$<br>$\epsilon_{260}=9580\text{ M}^{-1}\cdot\text{cm}^{-1}$<br>HRMS $m/z$ for $\text{C}_{25}\text{H}_{30}\text{N}_4\text{NaO}_7$ ( $\text{M}+\text{Na}^+$ ) <sup>+</sup> , calcd 521.2012, found 521.2019                                                                                                                                                                                                                                                                                                                                         |

|    |  |                                                                                                                                                |                                                                                                                                                                                                                                                                  |
|----|--|------------------------------------------------------------------------------------------------------------------------------------------------|------------------------------------------------------------------------------------------------------------------------------------------------------------------------------------------------------------------------------------------------------------------|
| 16 |  | ( <i>S</i> )-5-amino-4-(( <i>S</i> )-4-carboxy-2-(3-(3'-hydroxybiphenyl-4-yl)propanamido)butanamido)-5-oxopentanoic acid                       | Ascentis Express: $t_R=3,24\text{min}$<br>$\epsilon_{254}=13970 \text{ M}^{-1} \cdot \text{cm}^{-1}$<br>HRMS $m/z$ for $\text{C}_{25}\text{H}_{30}\text{N}_3\text{O}_8$ ( $\text{M}+\text{H}^+$ ) <sup>+</sup> ,<br>calcd 500.2033, found 500.2031               |
| 17 |  | ( <i>S</i> )-5-amino-4-(( <i>S</i> )-4-carboxy-2-(3-(3'-nitrobiphenyl-4-yl)propanamido)butanamido)-5-oxopentanoic acid                         | Ascentis Express: $t_R=4,20\text{min}$<br>$\epsilon_{254}=20158 \text{ M}^{-1} \cdot \text{cm}^{-1}$<br>HRMS $m/z$ for $\text{C}_{25}\text{H}_{29}\text{N}_4\text{O}_9$ ( $\text{M}+\text{H}^+$ ) <sup>+</sup> ,<br>calcd 529.1935, found 529.1954               |
| 18 |  | 4'-(( <i>S</i> )-1-(( <i>S</i> )-1-amino-4-carboxy-1-oxobutan-2-ylamino)-4-carboxy-1-oxobutan-2-ylamino)-3-oxopropylbiphenyl-3-carboxylic acid | Ascentis Express: $t_R=3,29\text{min}$<br>$\epsilon_{257}=6082 \text{ M}^{-1} \cdot \text{cm}^{-1}$<br>HRMS $m/z$ for $\text{C}_{26}\text{H}_{30}\text{N}_3\text{O}_9$ ( $\text{M}+\text{H}^+$ ) <sup>+</sup> ,<br>calcd 528.1982, found 528.1991                |
| 19 |  | ( <i>S</i> )-5-amino-4-(( <i>S</i> )-4-carboxy-2-(3-(3'-chlorobiphenyl-4-yl)propanamido)butanamido)-5-oxopentanoic acid                        | Ascentis Express: $t_R=4,84\text{min}$<br>$\epsilon_{260}=18195 \text{ M}^{-1} \cdot \text{cm}^{-1}$<br>HRMS $m/z$ for $\text{C}_{25}\text{H}_{29}\text{ClN}_3\text{O}_7$<br>( $\text{M}+\text{Na}^+$ ) <sup>+</sup> , calcd 540.1513, found<br>540.1482         |
| 20 |  | ( <i>S</i> )-5-amino-4-(( <i>S</i> )-4-carboxy-2-(3-(3',5'-dichlorobiphenyl-4-yl)propanamido)butanamido)-5-oxopentanoic acid                   | Ascentis Express: $t_R=5,48\text{min}$<br>$\epsilon_{260}=21808 \text{ M}^{-1} \cdot \text{cm}^{-1}$<br>HRMS $m/z$ for $\text{C}_{25}\text{H}_{28}\text{Cl}_2\text{N}_3\text{O}_7$<br>( $\text{M}+\text{H}^+$ ) <sup>+</sup> , calcd 552.1304, found<br>552.1320 |
| 21 |  | ( <i>S</i> )-5-amino-4-(( <i>S</i> )-4-carboxy-2-(3-(3'-methoxybiphenyl-4-yl)propanamido)butanamido)-5-oxopentanoic acid                       | Ascentis Express: $t_R=4,37\text{min}$<br>$\epsilon_{254}=12000 \text{ M}^{-1} \cdot \text{cm}^{-1}$<br>HRMS $m/z$ for $\text{C}_{26}\text{H}_{32}\text{N}_3\text{O}_8$ ( $\text{M}+\text{H}^+$ ) <sup>+</sup> ,<br>calcd 514.2189, found 514.2177               |
| 22 |  | ( <i>S</i> )-5-amino-4-(( <i>S</i> )-4-carboxy-2-(3-(3'-(hydroxymethyl)biphenyl-4-yl)propanamido)butanamido)-5-oxopentanoic acid               | Ascentis Express: $t_R=3,21\text{min}$<br>$\epsilon_{254}=21560 \text{ M}^{-1} \cdot \text{cm}^{-1}$<br>HRMS $m/z$ for $\text{C}_{26}\text{H}_{32}\text{N}_3\text{O}_8$ ( $\text{M}+\text{H}^+$ ) <sup>+</sup> ,<br>calcd 514.2189, found 514.2164               |
| 23 |  | ( <i>S</i> )-5-amino-4-(( <i>S</i> )-4-carboxy-2-(3-(4'-phenylbiphenyl-4-yl)propanamido)butanamido)-5-oxopentanoic acid                        | Ascentis Express: $t_R=5,70\text{min}$<br>$\epsilon_{280}=44827 \text{ M}^{-1} \cdot \text{cm}^{-1}$<br><sup>1</sup> H NMR (DMSO $d_6$ ): $\delta$ 1.74 (m, 2H),                                                                                                 |

|    |                                                                                     |                                                                                                                             |                                                                                                                                                                                                                                                                                                                                                                                                                                                                                                                                                                                                                                                                                                                                                                                                        |
|----|-------------------------------------------------------------------------------------|-----------------------------------------------------------------------------------------------------------------------------|--------------------------------------------------------------------------------------------------------------------------------------------------------------------------------------------------------------------------------------------------------------------------------------------------------------------------------------------------------------------------------------------------------------------------------------------------------------------------------------------------------------------------------------------------------------------------------------------------------------------------------------------------------------------------------------------------------------------------------------------------------------------------------------------------------|
|    |                                                                                     |                                                                                                                             | <p>1.90 (m, 2H), 2,21 (m, 4H), 2,51 (m, 2H), 2.83 (m, 2H), 4,19 (m, 2H), 7.11 (s, 1H), 7.31 (m, 3H), 7.38 (d, 1H, <math>J=7.25\text{Hz}</math>), 7.48 (t, 2H, <math>J=7.25\text{Hz}</math>), 7.64 (d, 2H, <math>J=8\text{Hz}</math>), 7.72 (m, 6H), 7.95 (d, 1H, <math>J=7.75\text{Hz}</math>), 8.14 (d, 1H, <math>J=7.5\text{Hz}</math>).</p> <p>HRMS <math>m/z</math> for <math>\text{C}_{31}\text{H}_{33}\text{N}_3\text{NaO}_7</math> (<math>\text{M}+\text{Na}^+</math>)<sup>+</sup>, calcd 582.2216, found 582.2210</p>                                                                                                                                                                                                                                                                          |
| 24 | 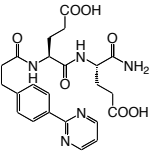   | <p>(<i>S</i>)-5-amino-4-((<i>S</i>)-4-carboxy-2-(3-(4-pyrimidin-2-yl)phenyl)propanamido)butanamido)-5-oxopentanoic acid</p> | <p>Ascentis Express: <math>t_{\text{R}}=2,40\text{min}</math><br/> <math>\epsilon_{266}=20275 \text{ M}^{-1} \cdot \text{cm}^{-1}</math><br/>           HRMS <math>m/z</math> for <math>\text{C}_{23}\text{H}_{28}\text{N}_5\text{O}_7</math> (<math>\text{M}+\text{H}^+</math>)<sup>+</sup>, calcd 486.1989, found 486.1982.</p>                                                                                                                                                                                                                                                                                                                                                                                                                                                                      |
| 25 |  | <p>(<i>S</i>)-5-amino-4-((<i>S</i>)-4-carboxy-2-(3-(4-thiophen-2-yl)phenyl)propanamido)butanamido)-5-oxopentanoic acid</p>  | <p>Ascentis Express: <math>t_{\text{R}}=4,10\text{min}</math><br/> <math>\epsilon_{285}=22000 \text{ M}^{-1} \cdot \text{cm}^{-1}</math><br/> <math>^1\text{H NMR}</math> (<math>\text{DMSO } d_6</math>): <math>\delta</math> 1.75 (m, 2H), 1.91 (m, 2H), 2,22 (m, 4H), 2,51 (m, 2H), 2.82 (m, 2H), 4,20 (m, 2H), 7.11 (m, 2H), 7.25 (d, 2H, <math>J=8\text{Hz}</math>), 7.32 (s, 1H), 7.46 (d, 1H, <math>J=3.5\text{Hz}</math>), 7.51 (d, 1H, <math>J=5.25\text{Hz}</math>), 7.56 (d, 2H, <math>J=8\text{Hz}</math>), 7.95 (d, 1H, <math>J=8\text{Hz}</math>), 8.14 (d, 1H, <math>J=7.5\text{Hz}</math>).</p> <p>HRMS <math>m/z</math> for <math>\text{C}_{23}\text{H}_{27}\text{N}_3\text{NaO}_7\text{S}</math> (<math>\text{M}+\text{Na}^+</math>)<sup>+</sup>, calcd 512.1467, found 512.1458</p> |
| 26 |  | <p>(<i>S</i>)-5-amino-4-((<i>S</i>)-4-carboxy-2-(3-(4-thiophen-3-yl)phenyl)propanamido)butanamido)-5-oxopentanoic acid</p>  | <p>Ascentis Express: <math>t_{\text{R}}=3,97\text{min}</math><br/> <math>\epsilon_{262}=14495 \text{ M}^{-1} \cdot \text{cm}^{-1}</math><br/>           HRMS <math>m/z</math> for <math>\text{C}_{23}\text{H}_{28}\text{N}_3\text{O}_7\text{S}</math> (<math>\text{M}+\text{H}^+</math>)<sup>+</sup>, calcd 490.1648, found 490.1636.</p>                                                                                                                                                                                                                                                                                                                                                                                                                                                              |

|    |                                                                                     |                                                                                                                                               |                                                                                                                                                                                                                                                             |
|----|-------------------------------------------------------------------------------------|-----------------------------------------------------------------------------------------------------------------------------------------------|-------------------------------------------------------------------------------------------------------------------------------------------------------------------------------------------------------------------------------------------------------------|
| 27 | 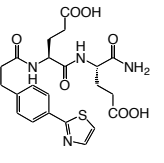   | ( <i>S</i> )-5-amino-4-(( <i>S</i> )-4-carboxy-2-(3-(4-(thiazol-2-yl)phenyl)propanamido)butanamido)-5-oxopentanoic acid                       | Ascentis Express: $t_R=2,69\text{min}$<br>$\epsilon_{288}=27972 \text{ M}^{-1} \cdot \text{cm}^{-1}$<br>HRMS $m/z$ for $\text{C}_{22}\text{H}_{27}\text{N}_4\text{O}_7\text{S}$ ( $\text{M}+\text{H}^+$ ) <sup>+</sup> ,<br>calcd 491.1601, found 491.1585. |
| 28 |    | ( <i>S</i> )-4-(3-(4-(1,2,3-thiadiazol-4-yl)phenyl)propanamido)-5-(( <i>S</i> )-1-amino-4-carboxy-1-oxobutan-2-ylamino)-5-oxopentanoic acid   | Ascentis Express: $t_R=3,27\text{min}$<br>$\epsilon_{245}=10729 \text{ M}^{-1} \cdot \text{cm}^{-1}$<br>HRMS $m/z$ for $\text{C}_{21}\text{H}_{26}\text{N}_5\text{O}_7\text{S}$ ( $\text{M}+\text{H}^+$ ) <sup>+</sup> ,<br>calcd 492.1553, found 492.1551. |
| 29 |    | ( <i>S</i> )-4-(3-(4-(1 <i>H</i> -pyrrol-1-yl)phenyl)propanamido)-5-(( <i>S</i> )-1-amino-4-carboxy-1-oxobutan-2-ylamino)-5-oxopentanoic acid | Ascentis Express: $t_R=3,69\text{min}$<br>$\epsilon_{253}=14677 \text{ M}^{-1} \cdot \text{cm}^{-1}$<br>HRMS $m/z$ for $\text{C}_{23}\text{H}_{28}\text{N}_4\text{NaO}_7$ ( $\text{M}+\text{Na}^+$ ) <sup>+</sup> , calcd 495.1856, found 495.1860.         |
| 30 |    | ( <i>S</i> )-5-amino-4-(( <i>S</i> )-4-carboxy-2-(3-(4-(1-methyl-1 <i>H</i> -pyrazol-3-yl)phenyl)propanamido)butanamido)-5-oxopentanoic acid  | Ascentis Express: $t_R=2,60\text{min}$<br>$\epsilon_{257}=24934 \text{ M}^{-1} \cdot \text{cm}^{-1}$<br>HRMS $m/z$ for $\text{C}_{23}\text{H}_{30}\text{N}_5\text{O}_7$ ( $\text{M}+\text{H}^+$ ) <sup>+</sup> ,<br>calcd 488.2145, found 488.2143.         |
| 31 |  | ( <i>S</i> )-5-amino-4-(( <i>S</i> )-4-carboxy-2-(3-(4-(5-methyl-1,2,4-oxadiazol-3-yl)phenyl)propanamido)butanamido)-5-oxopentanoic acid      | Ascentis Express: $t_R=2,77\text{min}$<br>$\epsilon_{246}=15544 \text{ M}^{-1} \cdot \text{cm}^{-1}$<br>HRMS $m/z$ for $\text{C}_{22}\text{H}_{28}\text{N}_5\text{O}_8$ ( $\text{M}+\text{H}^+$ ) <sup>+</sup> ,<br>calcd 490.1938, found 490.1922.         |
| 32 |  | ( <i>S</i> )-5-amino-4-(( <i>S</i> )-4-carboxy-2-(3-(4-(5-methylthiophen-2-yl)phenyl)propanamido)butanamido)-5-oxopentanoic acid              | Ascentis Express: $t_R=4,61\text{min}$<br>$\epsilon_{292}=21893 \text{ M}^{-1} \cdot \text{cm}^{-1}$<br>HRMS $m/z$ for $\text{C}_{24}\text{H}_{29}\text{N}_3\text{NaO}_7\text{S}$ ( $\text{M}+\text{Na}^+$ ) <sup>+</sup> , calcd 526.1624, found 526.1620  |
| 33 |  | ( <i>S</i> )-5-amino-4-(( <i>S</i> )-4-carboxy-2-(3-(4-(4-methylthiophen-2-yl)phenyl)propanamido)butanamido)-5-oxopentanoic acid              | Ascentis Express: $t_R=4,58\text{min}$<br>$\epsilon_{290}=16369 \text{ M}^{-1} \cdot \text{cm}^{-1}$<br>HRMS $m/z$ for $\text{C}_{24}\text{H}_{30}\text{N}_3\text{O}_7\text{S}$ ( $\text{M}+\text{H}^+$ ) <sup>+</sup> ,<br>calcd 504.1804 found 504.1782   |
| 34 |  | ( <i>S</i> )-5-amino-4-(( <i>S</i> )-4-carboxy-2-(3-(4-(3-methylthiophen-2-yl)phenyl)propanamido)butanamido)-5-oxopentanoic acid              | Ascentis Express: $t_R=4,53\text{min}$<br>$\epsilon_{271}=1472 \text{ M}^{-1} \cdot \text{cm}^{-1}$<br>HRMS $m/z$ for $\text{C}_{24}\text{H}_{29}\text{N}_3\text{NaO}_7\text{S}$ ( $\text{M}+\text{Na}^+$ ) <sup>+</sup> , calcd 526.1624, found            |

|    |                                                                                     |                                                                                                                                  |                                                                                                                                                                                                                                                                                                                                                                                                                                                                                                                                                                                                                                                                                                                                                                                                                                    |
|----|-------------------------------------------------------------------------------------|----------------------------------------------------------------------------------------------------------------------------------|------------------------------------------------------------------------------------------------------------------------------------------------------------------------------------------------------------------------------------------------------------------------------------------------------------------------------------------------------------------------------------------------------------------------------------------------------------------------------------------------------------------------------------------------------------------------------------------------------------------------------------------------------------------------------------------------------------------------------------------------------------------------------------------------------------------------------------|
|    |                                                                                     |                                                                                                                                  | 526.1627                                                                                                                                                                                                                                                                                                                                                                                                                                                                                                                                                                                                                                                                                                                                                                                                                           |
| 35 | 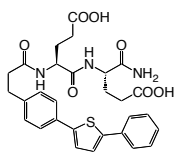   | ( <i>S</i> )-5-amino-4-(( <i>S</i> )-4-carboxy-2-(3-(4-(5-phenylthiophen-2-yl)phenyl)propanamido)butanamido)-5-oxopentanoic acid | <p>Ascentis Express: <math>t_R=5,72\text{min}</math><br/> <math>\epsilon_{338}=30000\text{ M}^{-1}\cdot\text{cm}^{-1}</math><br/> <math>^1\text{H NMR}</math> (DMSO <math>d_6</math>): <math>\delta</math> 1.76 (m, 2H), 1.91 (m, 2H), 2,22 (m, 4H), 2,51 (m, 2H), 2.82 (m, 2H), 4,21 (m, 2H), 7.11 (s, 1H), 7.30 (m, 4H), 7.44 (t, 2H, <math>J=7.25\text{Hz}</math>), 7.49 (d, 1H, <math>J=4\text{Hz}</math>), 7.54 (d, 1H, <math>J=3.75\text{Hz}</math>), 7.60 (d, 2H, <math>J=8\text{Hz}</math>), 7.70 (d, 2H, <math>J=7.5\text{Hz}</math>), 7.96 (d, 1H, <math>J=7.75\text{Hz}</math>), 8.16 (d, 1H, <math>J=7.25\text{Hz}</math>).</p> <p>HRMS <math>m/z</math> for <math>\text{C}_{29}\text{H}_{31}\text{N}_3\text{NaO}_7\text{S}</math> (<math>\text{M}+\text{Na}^+</math>)<sup>+</sup>, calcd 588.1780, found 588.1776</p> |
| 36 |  | ( <i>S</i> )-5-amino-4-(( <i>S</i> )-4-carboxy-2-(3-(4-(4-phenylthiophen-2-yl)phenyl)propanamido)butanamido)-5-oxopentanoic acid | <p>Ascentis Express: <math>t_R=5,61\text{min}</math><br/> <math>\epsilon_{259}=34583\text{ M}^{-1}\cdot\text{cm}^{-1}</math><br/> <math>^1\text{H NMR}</math> (DMSO <math>d_6</math>): <math>\delta</math> 1.76 (m, 2H), 1.91 (m, 2H), 2,22 (m, 4H), 2,51 (m, 2H), 2.84 (m, 2H), 4,21 (m, 2H), 7.11 (s, 1H), 7.30 (m, 4H), 7.44 (t, 2H, <math>J=7\text{Hz}</math>), 7.65 (d, 2H, <math>J=8.25\text{Hz}</math>), 7.79 (d, 2H, <math>J=7.25\text{Hz}</math>), 7.85 (s, 1H), 7.96 (m, 2H), 8.16 (d, 1H, <math>J=7.5\text{Hz}</math>).</p> <p>HRMS <math>m/z</math> for <math>\text{C}_{29}\text{H}_{32}\text{N}_3\text{O}_7\text{S}</math> (<math>\text{M}+\text{H}^+</math>)<sup>+</sup>, calcd 566.1961, found 566.1953</p>                                                                                                         |



**Table S3:** Ki values (nM) of compounds **4** to **36** towards a set of MMPs.

| Ki (nM)   |         |        |        |        |        |        |         |         |         |         |
|-----------|---------|--------|--------|--------|--------|--------|---------|---------|---------|---------|
|           | MMP-1h  | MMP-2h | MMP-3h | MMP-7h | MMP-8h | MMP-9h | MMP-10h | MMP-12h | MMP-13h | MMP-14h |
| <b>4</b>  | 1000    | 72     | 58     | 1000   | 77     | 850    | 8,3     | 0,2     | 13      | 80      |
| <b>5</b>  | 17900   | 76     | 62     | 1200   | 181    | 565    | 48      | 8,3     | 40      | 2060    |
| <b>6</b>  | ND      | 90     | 118    | ND     | 119    | 120    | 122     | 11.8    | 46      | 1130    |
| <b>7</b>  | ND      | 225    | 1700   | ND     | 49     | 768    | 2500    | 190     | 85      | 2500    |
| <b>8</b>  | ND      | 83     | 78     | ND     | 383    | 1720   | 114     | 3.4     | 60      | 1990    |
| <b>9</b>  | 17300   | 756    | 11200  | 16300  | 112    | 3510   | 1770    | 119     | 2000    | 3100    |
| <b>10</b> | ND      | 5000   | 2000   | ND     | 1000   | 1500   | 3300    | 2200    | 2000    | 2000    |
| <b>11</b> | ND      | 1400   | 1000   | ND     | 332    | 1000   | 1600    | 130     | 580     | 2500    |
| <b>12</b> | ND      | 1000   | 5000   | ND     | 1000   | 1500   | 7000    | 3300    | 1000    | 8000    |
| <b>13</b> | ND      | 2000   | 1000   | ND     | 2300   | 1000   | 1000    | 4000    | 864     | 1000    |
| <b>14</b> | >100000 | 445    | 6700   | 24700  | 226    | 1090   | 1110    | 18,6    | 689     | 5900    |
| <b>15</b> | ND      | 2140   | 2100   | ND     | 2140   | 1440   | 2390    | 190     | 2380    | 3350    |
| <b>16</b> | ND      | 11400  | 29900  | ND     | 1660   | 4340   | 3070    | 176     | 28700   | 28700   |
| <b>17</b> | ND      | 2600   | 24100  | ND     | 1250   | 1365   | 3390    | 73      | 463     | 8020    |

|           |         |      |       |      |      |      |       |      |       |       |
|-----------|---------|------|-------|------|------|------|-------|------|-------|-------|
| <b>18</b> | ND      | 6380 | 13100 | ND   | 4450 | 4150 | 11700 | 91   | 6930  | 26000 |
| <b>19</b> | ND      | 2820 | 55000 | ND   | 1890 | 1880 | 6920  | 57   | 1850  | 2370  |
| <b>20</b> | ND      | 1200 | 1810  | ND   | 4820 | 1665 | 2850  | 56   | 1630  | 2340  |
| <b>21</b> | ND      | 8930 | 25300 | ND   | 1640 | 8070 | 4170  | 35   | 5460  | 15800 |
| <b>22</b> | ND      | 7465 | 13300 | ND   | 809  | 9100 | 7650  | 52   | 4730  | 12500 |
| <b>23</b> | 7800    | 53   | 74    | 502  | 132  | 1740 | 76    | 1.63 | 20    | 1980  |
| <b>24</b> | ND      | 7860 | 1670  | ND   | 1470 | 1460 | 4920  | 6540 | 12500 | 1010  |
| <b>25</b> | >100000 | 142  | 2210  | 4000 | 40   | 1540 | 373   | 8.6  | 321   | 1710  |
| <b>26</b> | ND      | 492  | 3070  | ND   | 60   | 1790 | 661   | 11.9 | 895   | 2630  |
| <b>27</b> | ND      | 657  | 5000  | ND   | 1000 | 1070 | 1850  | 369  | 240   | 2820  |
| <b>28</b> | ND      | 442  | 281   | ND   | 231  | 199  | 679   | 158  | 212   | 438   |
| <b>29</b> | ND      | 1370 | 2040  | ND   | 373  | 1050 | 1840  | 59   | 1220  | 4850  |
| <b>30</b> | ND      | 1175 | 14200 | ND   | 2190 | 1900 | 10200 | 797  | 518   | 1000  |
| <b>31</b> | ND      | 3400 | 6040  | ND   | 839  | 2060 | 8320  | 155  | 1090  | 2650  |
| <b>32</b> | ND      | 97   | 2210  | ND   | 10.3 | 242  | 353   | 1.84 | 564   | 1700  |
| <b>33</b> | ND      | 868  | 3260  | ND   | 233  | 2760 | 1415  | 22   | 1300  | 9930  |
| <b>34</b> | ND      | 3380 | 12600 | ND   | 766  | 9130 | 2190  | 84   | 1780  | 6310  |

|           |       |      |      |      |     |      |     |      |     |      |
|-----------|-------|------|------|------|-----|------|-----|------|-----|------|
| <b>35</b> | ND    | 279  | 108  | ND   | 381 | 874  | 156 | 2.58 | 200 | 2280 |
| <b>36</b> | 11800 | 1060 | 3880 | 2000 | 410 | 9890 | 872 | 1.92 | 684 | 3010 |

Ki (nM) were determined in 50 mM Tris/HCl Buffer, pH 6.8, 10 mM CaCl<sub>2</sub> at 25°

## 2) Supplemental experimental procedures

All Commercially available reagents and solvents were used as received without further purification. Synphase Lanterns® (Polyamide, D-series lantern, Rink amide Fmoc protected, 8µmol/lantern) were purchased from Mimotopes (Australia). Fmoc-amino acids-OH were purchased from Novabiochem. 6-Chloro-1-Hydroxybenzotriazole (ClHOBt) was purchased from Molekula. Diisopropylcarbodiimide (DIC), Trifluoroacetic acid (TFA) and triisopropylsilane (TIS) were from Aldrich. Anhydrous N,N-dimethyl formamide (DMF) was from Fluka. Microwave experiments were performed with a Discover apparatus (CEM mWave) in 10mL sealed reactions tubes or using open vessel mode with SPS kit. TLC plates were Merck TLC aluminum sheets coated with silica gel 60F<sub>254</sub>. Compounds were purified by Flash chromatography (Silica gel Si 60, 40-43mm).

<sup>1</sup>H NMR spectra were recorded on 250 MHz Bruker instrument. Chemical shifts are reported in ppm with the solvent as internal standard (CDCl<sub>3</sub> : 7.26ppm, MeOH d<sub>4</sub>=3.31ppm, DMSO d<sub>6</sub> =2.50ppm). Data are reported as followed: chemical shift, multiplicity (s= singlet, d= doublet, t= triplet, q= quartet, br= broad, m= multiplet), integration and coupling constants (Hz). <sup>13</sup>C NMR spectra were recorded on 125MHz NMR instruments with complete proton decoupling. Chemical shifts are reported in ppm with the solvent as internal standard (CDCl<sub>3</sub>: 77.16ppm, MeOH d<sub>4</sub>=49.00ppm, DMSO d<sub>6</sub> =39.52ppm). DO measurements were performed with a Beckman DU640B spectrophotometer.

Electron spray mass spectrometry (ESMS) was performed with an ESI-QTRAP (Applied Biosystems-MDS Sciex, mass spectrometry platform at UPMC, Paris, France). HRMS spectra were registered using a 4800 MALDI-TOF mass spectrometer (Applied Biosystems, Foster City, USA) in positive reflectron mode in the m/z range of 100-700. Each spectrum was the result of 1000 to 2000 shots (20 different positions into each spot and 50 shots per sub-spectrum) and internal calibration was applied by using 4-HCCA matrix m/z.

Analytical and preparative RP-HPLC separations were respectively performed on a Thermo separation product and Gilson apparatus using analytical Supelco Ascentis® Express (100x4,6mm, 2,7mm, Gradient: 0 to 10 min/0 to 100% (B), flow rate=1,8mL.min<sup>-1</sup>) and AIT C18 Kromasil (250x20 mm, 10mm, 100Å,

Gradient: 0 to 40 min/0 to 100% (B), flow rate=3mL.min<sup>-1</sup>). UV detection was performed at 230 nm. A solvent system consisting of (A) 0,1% TFA in 90% water-10% acetonitrile and (B) 0,09% TFA in 90% acetonitrile-10% water was used. Retention times ( $t_R$ ) from analytical RP-HPLC are reported in minutes.

Amino acids compositions were made under standard conditions: samples were vacuum dried and sealed in glass tubes using the PicoTag system (Waters Associates, Milford, MA) and hydrolyzed under vapor phase of 6N HCl with a crystal of phenol through 17h at 110°C. The hydrolyzed sample was dissolved in 100 µl of MilliQ water and 90 µl of the HCl hydrolysate (containing a minimum of 200pmol of each AA) were analyzed and quantified *via* ninhydrin derivatization on an aminoTac JLC-500/V amino acids analyzer (JEOL, Japan). A calibration with an amino acids standard H solution was performed at the beginning of each analysis series.

### Pseudo peptide synthesis (5 to 36)

Pseudo peptides **5** to **36** were synthesized on solid support according to the general pathway described in scheme 1S.

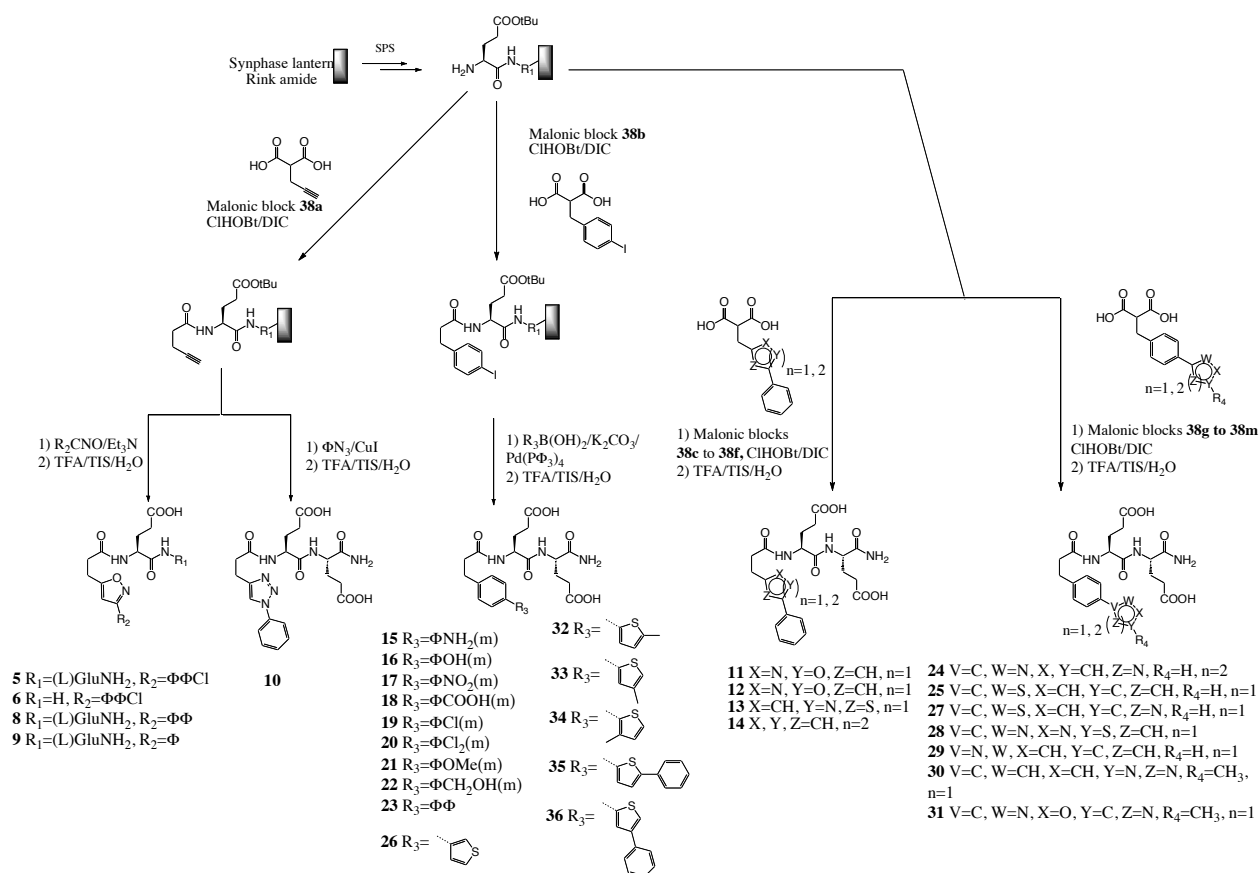

Scheme 1S: General pathway of synthesis for compounds **5** to **36**

Malonic building blocks synthesis.

Malonic building blocks **38a** to **38m** were synthesized in 2 steps according to scheme 2.

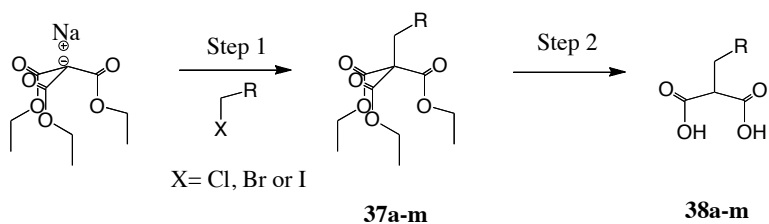

Scheme 2S: 2 steps malonic building blocks synthesis.

Step 1, general procedure: In a 10ml microwave reactor triethyl methane carboxylate sodium derivative (3,9mmol, 1eq) halogeno alkyl derivative (4,3 mmol, 1,1eq) and anhydrous DMF (5mL) were mixed and stirred at 100°C under microwave irradiation (300W) for 5min. The reaction completion was monitored by TLC (CHX/EtOAc : 9/1). The reaction mixture was then evaporated under reduced pressure and crude solution was suspended in EtOAc/H<sub>2</sub>O (1/1:10mL/10mL). Aqueous layer was extracted with EtOAc (2x10mL) combined organic layers were washed with brine (20mL) and dried over anhydrous MgSO<sub>4</sub>. The solvent was then concentrated under vacuum and crude compound was purified by Flash chromatography (CHX/EtOAc) to afford triester **37**.

Step 2, general procedure: Triester **37** (3,93mmol) was dissolved in EtOH (10mL) and potassium hydroxide (23,58mmol, 6eq) was added. The solution mixture was stirred at room temperature for 1h and then evaporated. Crude solid was suspended in 1M HCl<sub>aq</sub> solution/EtOAc (1/1: 10mL/10mL). Aqueous layer was saturated with NaCl and extracted with EtOAc (2x10mL). Combined organic layers were washed with brine (20mL) and dried over anhydrous MgSO<sub>4</sub>. After evaporation, crude solid was triturated in DCM (1mL) and filtrated to afford malonic acid derivative **38**.

Triethyl but-3-yne-1,1,1-tricarboxylate **37a**

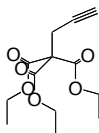

**37a**

Prepared from propargyl bromide (Fluka 81831, 80% in toluene) according to the alkylation protocol to provide the title compound as a pale yellow oil (88% yield). <sup>1</sup>H NMR (CDCl<sub>3</sub>): δ 1.29 (t, 9H, *J*=7Hz), 2.05

(t, 1H,  $J=2,75\text{Hz}$ ), 3.01 (d, 2H,  $J=2,75\text{Hz}$ ), 4,29 (q, 6H,  $J=7\text{Hz}$ ).  $^{13}\text{C}$  NMR ( $\text{CDCl}_3$ ):  $\delta$  14.00, 23.41, 62.70, 64.68, 70.88, 78.87, 165.90.

2-(prop-2-ynyl)malonic acid **38a**

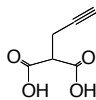

**38a**

Prepared from triester **37a** according to the saponification protocol to provide the title compound as a white solid (86 % yield).  $^1\text{H}$  NMR ( $\text{MeOH } d_4$ ):  $\delta$  2.33 (t, 1H,  $J=2,75\text{Hz}$ ), 2.69 (dt, 2H,  $J=2,75\text{Hz}$ ,  $J=5,25\text{Hz}$ ), 3.51 (t, 1H,  $J=5,25\text{Hz}$ ).  $^{13}\text{C}$  NMR ( $\text{MeOH } d_4$ ):  $\delta$  19,13, 71,27, 81,34, 171.51.

Triethyl 2-(4-iodophenyl)ethane-1,1,1-tricarboxylate **37b**

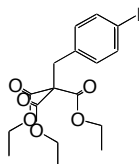

**37b**

Prepared from 4-Iodobenzyl bromide (Aldrich 515604) according to the alkylation protocol to provide the title compound as a pale yellow oil (94% yield).  $^1\text{H}$  NMR ( $\text{CDCl}_3$ ):  $\delta$  1.21 (t, 9H,  $J=6,75\text{Hz}$ ), 3.44 (s, 2H), 4,19 (q, 6H,  $J=6,75\text{Hz}$ ), 7.05 (d, 2H,  $J=8\text{Hz}$ ), 7.56 (d, 2H,  $J=8\text{Hz}$ ).

2-(4-iodobenzyl)malonic acid **38b**

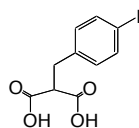

**38b**

Prepared from triester **37b** according to the saponification protocol to provide the title compound as a white solid (78% yield).  $^1\text{H}$  NMR ( $\text{MeOH } d_4$ ):  $\delta$  3.10 (d, 2H,  $J=7,75\text{Hz}$ ), 3.61 (t, 1H,  $J=7,75\text{Hz}$ ). 7.04 (d,

2H,  $J=8\text{Hz}$ ), 7.61 (d, 2H,  $J=8\text{Hz}$ ),  $^{13}\text{C}$  NMR (MeOH  $d_4$ ):  $\delta$  35.20, 54.72, 92.45, 132.11, 138.60, 139.58, 172.33. HRMS  $m/z$  for  $\text{C}_{10}\text{H}_9\text{INaO}_4$  ( $\text{M}+\text{Na}^+$ ), calcd 342.9443, found 342.9430.

Triethyl 2-(5-phenylisoxazol-3-yl)ethane-1,1,1-tricarboxylate **37c**

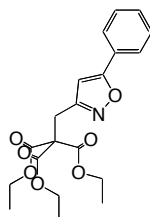

**37c**

Prepared from 3-chloromethyl-5-phenyl isoxazole (Maybridge CC30524) according to the alkylation protocol to provide the title compound as a pale yellow oil (73% yield).  $^1\text{H}$  NMR ( $\text{CDCl}_3$ ):  $\delta$  1.27 (t, 9H,  $J=7.25\text{Hz}$ ), 3.59 (s, 2H), 4.28 (q, 6H,  $J=7.25\text{Hz}$ ), 6.53 (s, 1H), 7.44 (m, 3H), 7.74 (m, 2H).

2-((5-phenylisoxazol-3-yl)methyl)malonic acid **38c**

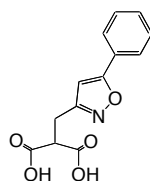

**38c**

Prepared from triester **37c** according to the saponification protocol to provide the title compound as a white solid (53% yield).  $^1\text{H}$  NMR (MeOH  $d_4$ ):  $\delta$  3.26 (d, 2H,  $J=7.5\text{Hz}$ ), 3.86 (t, 1H,  $J=7.5\text{Hz}$ ), 6.71 (s, 1H), 7.49 (m, 3H), 7.81 (m, 2H).  $^{13}\text{C}$  NMR (MeOH  $d_4$ ):  $\delta$  26.51, 51.66, 100.83, 126.73, 128.58, 130.19, 131.44, 163.40, 171.28, 171.97. HRMS  $m/z$  for  $\text{C}_{13}\text{H}_{12}\text{NO}_5$  ( $\text{M}+\text{H}^+$ ), calcd 262.0715, found 262.0714.

triethyl 2-(2-phenylthiazol-4-yl)ethane-1,1,1-tricarboxylate **37d**

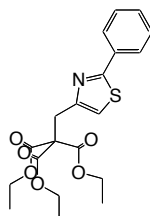

**37d**

Prepared from 4-(Chloromethyl)-2-phenyl-1,3-thiazole (Maybridge CC18324) according to the alkylation protocol to provide the title compound as a yellow oil (58% yield).  $^1\text{H}$  NMR ( $\text{CDCl}_3$ ):  $\delta$  1,25 (t, 9H,  $J=7,25\text{Hz}$ ), 3,70 (s, 2H), 4,24 (q, 6H,  $J=7,25\text{Hz}$ ), 7,11 (s, 1H), 7,43 (m, 3H), 7,9 (m, 2H).  $^{13}\text{C}$  NMR ( $\text{CDCl}_3$ ):  $\delta$  13.95, 14.03, 34.49, 62.31, 62.54, 65.73, 116.16, 126.51, 128.94, 129.91, 133.75, 152.20, 164.07, 166.75, 166.63.  $[\text{M}+\text{H}]^+ = 406.1$ ,  $[\text{M}+\text{Na}]^+ = 428.1$ .

2-((2-phenylthiazol-4-yl)methyl)malonic acid **38d**

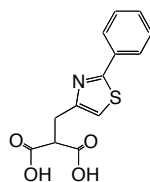

**38d**

Prepared from triester **37d** according to the saponification protocol to provide the title compound as a white solid (35% yield).  $^1\text{H}$  NMR ( $\text{MeOH } d_4$ ):  $\delta$  3.37 (d, 2H,  $J=7.75\text{Hz}$ ), 3.93 (t, 1H,  $J=7.75\text{Hz}$ ), 7.32 (s, 1H), 7.49 (m, 3H), 7.94 (m, 2H).  $^{13}\text{C}$  NMR ( $\text{MeOH } d_4$ ):  $\delta$  31.17, 52.76, 116.79, 127.47, 127.62, 130.20, 131.51, 131.66, 134.03, 154.62, 172.25. HRMS  $m/z$  for  $\text{C}_{13}\text{H}_{12}\text{NO}_4\text{S}$  ( $\text{M}+\text{H}^+$ ), calcd 278.0496, found 278.0488.



Triethyl 2-(5-phenyl-1,2,4-oxadiazol-3-yl)ethane-1,1,1-tricarboxylate **37e**

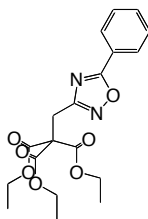

**37e**

Prepared from 3-chloromethyl-5 phenyl 1,2,4 oxadiazole (Maybridge, SEW02030) according to the alkylation protocol to provide the title compound as a yellow oil (55% yield).  $^1\text{H}$  NMR ( $\text{CDCl}_3$ ):  $\delta$  1,21 (t, 9H,  $J=7,25\text{Hz}$ ), 3,72 (s, 2H), 4,29 (q, 6H,  $J=7,25\text{Hz}$ ), 7,5 (m, 3H), 8,02 (d, 2H,  $J=8\text{Hz}$ ).  $^{13}\text{C}$  NMR ( $\text{CDCl}_3$ ):  $\delta$  13.94, 14.05, 29.59, 62.56, 62.75, 64.35, 124.33, 128.14, 129.13, 132.74, 164.08, 166.06, 167.77, 175.15.  $[\text{M}+\text{H}]^+ = 391.3$ ,  $[\text{M}+\text{Na}]^+ = 413,2$ .

2-((5-phenyl-1,2,4-oxadiazol-3-yl)methyl)malonic acid **38e**

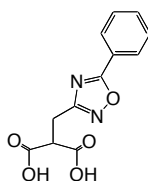

**38e**

Prepared from triester **37e** according to the saponification protocol to provide the title compound as a white solid (30 % yield).  $^1\text{H}$  NMR ( $\text{MeOH } d_4$ ):  $\delta$  3.35 (d, 2H,  $J=7,5\text{Hz}$ ), 3.99 (t, 1H,  $J=7,5\text{Hz}$ ). 7.55-7.66 (m, 3H), 8,12 (m, 2H).  $^{13}\text{C}$  NMR ( $\text{MeOH } d_4$ ):  $\delta$  26.54, 125.21, 128.99, 129.03, 130.41, 134.19, 170.21, 171.62, 177.05. HRMS  $m/z$  for  $\text{C}_{12}\text{H}_{11}\text{N}_2\text{O}_5$  ( $\text{M}+\text{H}^+$ ) $^+$ , calcd 263.0668, found 263.0661.

Triethyl 2-(biphenyl-4-yl)ethane-1,1,1-tricarboxylate **37f**

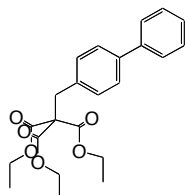

**37f**

Prepared from 4-(bromomethyl)-4-biphenyl 96% (Acros 368950050) according to the alkylation protocol to provide the title compound as a pale yellow oil (91% yield).  $^1\text{H}$  NMR ( $\text{CDCl}_3$ ):  $\delta$  1.22 (t, 9H,  $J=7.25\text{Hz}$ ), 3.56 (s, 2H), 4.28 (q, 6H,  $J=7.25\text{Hz}$ ), 7.29-7.58 (m, 9H).  $^{13}\text{C}$  NMR ( $\text{CDCl}_3$ ):  $\delta$  13.99, 27.05, 38.46, 62.32, 66.89, 126.80, 127.15, 127.31, 128.86, 131.10, 134.80, 140.00, 141.00, 166.66.

2-(biphenyl-4-ylmethyl)malonic acid **38f**

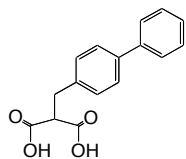

**38f**

Prepared from triester **37f** according to the saponification protocol to provide the title compound as a white solid (66% yield).  $^1\text{H}$  NMR ( $\text{MeOH } d_4$ ):  $\delta$  3.20 (d, 2H,  $J=8\text{Hz}$ ), 3.67 (t, 1H,  $J=8\text{Hz}$ ), 7.30-7.59 (m, 9H).  $^{13}\text{C}$  NMR ( $\text{MeOH } d_4$ ):  $\delta$  35.50, 55.02, 127.85, 128.02, 128.20, 129.82, 130.38, 138.87, 140.81, 142.16, 172.50. HRMS  $m/z$  for  $\text{C}_{16}\text{H}_{14}\text{NaO}_4$  ( $\text{M}+\text{Na}^+$ ), calcd 293.0790, found 293.0797.

Triethyl 2-(4-(pyrimidin-2-yl)phenyl)ethane-1,1,1-tricarboxylate **37g**

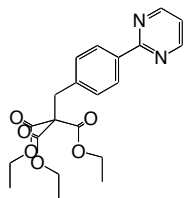

**37g**

Prepared from 2-[4-(Chloromethyl)phenyl]pyrimidine (Maybridge, CC56224) according to the alkylation protocol to provide the title compound as a pale yellow oil ( $\geq 95\%$  yield).  $^1\text{H}$  NMR ( $\text{CDCl}_3$ ):  $\delta$  1.21 (t, 9H,  $J=7.25\text{Hz}$ ), 3.59 (s, 2H), 4.19 (q, 6H,  $J=7.25\text{Hz}$ ), 7.17 (s, 1H,  $J=4.75\text{Hz}$ ), 7.40 (d, 2H,  $J=8.25\text{Hz}$ ), 8.32 (d, 2H,  $J=8.25\text{Hz}$ ), 8.78 (d, 2H,  $J=4.75\text{Hz}$ ).

2-(4-(pyrimidin-2-yl)benzyl)malonic acid **38g**

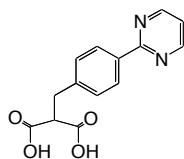

**38g**

Prepared from triester **37g** according to the saponification protocol to provide the title compound as a white solid (59% yield).  $^1\text{H}$  NMR ( $\text{MeOH } d_4$ ):  $\delta$  3.22 (d, 2H,  $J=7.75\text{Hz}$ ), 3.69 (t, 1H,  $J=7.75\text{Hz}$ ), 7.33 (m, 3H), 8.28 (d, 2H,  $J=8.25\text{Hz}$ ), 8.79 (d, 2H,  $J=4.75\text{Hz}$ ).  $^{13}\text{C}$  NMR ( $\text{MeOH } d_4$ ):  $\delta$  35.60, 54.70, 120.62, 129.30, 130.22, 137.09, 142.97, 158.68, 165.60, 172.40. HRMS  $m/z$  for  $\text{C}_{14}\text{H}_{13}\text{N}_2\text{O}_4$  ( $\text{M}+\text{H}^+$ ) $^+$ , calcd 273.0875, found 273.0881.

Triethyl 2-(4-(thiophen-2-yl)phenyl)ethane-1,1,1-tricarboxylate **37h**

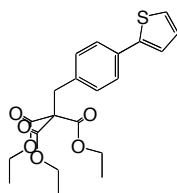

**37h**

Prepared from 2-[4-(Bromomethyl)phenyl]thiophene (Maybridge, CC12008) according to the alkylation protocol to provide the title compound as a yellow oil ( $\geq 95\%$  yield).

$^1\text{H}$  NMR ( $\text{CDCl}_3$ ):  $\delta$  1.22 (t, 9H,  $J=7\text{Hz}$ ), 3.51 (s, 2H), 4.31 (q, 6H,  $J=7\text{Hz}$ ), 7.05 (m, 1H), 7.27 (m, 4H), 7.50 (d, 2H,  $J=8.25\text{Hz}$ ).

2-(4-(thiophen-2-yl)benzyl)malonic acid **38h**

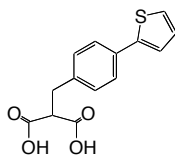

**38h**

Prepared from triester **37h** according to the saponification protocol to provide the title compound as a pale green solid (68% yield). <sup>1</sup>H NMR (MeOH d<sub>4</sub>): δ 3.16 (d, 2H, *J*=7.75Hz), 3.65 (t, 1H, *J*=7.75Hz), 7.06 (m, 1H), 7.26 (d, 2H, *J*=8.25Hz), 7.33 (m, 2H), 7.54 (d, 2H, *J*=8.25Hz). <sup>13</sup>C NMR (MeOH d<sub>4</sub>): 34.06, 53.47, 122.55, 124.14, 125.34, 127.61, 129.06, 129.09, 132.76, 137.70, 143.80, 170.97. HRMS *m/z* for C<sub>14</sub>H<sub>13</sub>O<sub>4</sub>S (M+H<sup>+</sup>)<sup>+</sup>, calcd 277.0535, found 277.0538.

Triethyl 2-(4-(thiazol-2-yl)phenyl)ethane-1,1,1-tricarboxylate **37i**

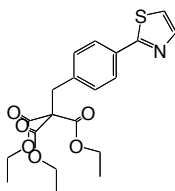

**37i**

Prepared from 2-[4-(Chloromethyl)phenyl]-1,3-thiazole (Maybridge, CC40224) according to the alkylation protocol to provide the title compound as a yellow oil (≥95% yield). <sup>1</sup>H NMR (CDCl<sub>3</sub>): δ 1.20 (t, 9H, *J*=7.25Hz), 3.54 (s, 2H), 4.19 (q, 6H, *J*=7.25Hz), 7.33 (m, 4H), 7.83 (m, 2H).

2-(4-(thiazol-2-yl)benzyl)malonic acid **38i**

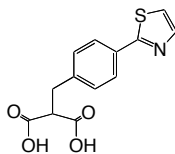

**38i**

Prepared from triester **37i** according to the saponification protocol to provide the title compound as a pale blue solid (84% yield). <sup>1</sup>H NMR (MeOH d<sub>4</sub>): δ 3.19 (d, 2H, *J*=7.5Hz), 3.68 (t, 1H, *J*=7.5Hz), 7.35 (d, 2H, *J*=8.25Hz), 7.54 (d, 1H, *J*=3.25Hz), 7.82 (m, 3H). <sup>13</sup>C NMR (MeOH d<sub>4</sub>): 34.17, 53.25, 119.20, 126.33, 129.35, 131.46, 141.08, 142.81, 168.66, 170.83. HRMS *m/z* for C<sub>13</sub>H<sub>12</sub>NO<sub>4</sub>S (M+H<sup>+</sup>)<sup>+</sup>, calcd 278.0487, found 278.0483.

Triethyl 2-(4-(1,2,3-thiadiazol-4-yl)phenyl)ethane-1,1,1-tricarboxylate **37j**

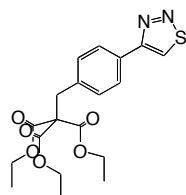

**37j**

Prepared from 4-[4-(Bromomethyl)phenyl]-1,2,3-thiadiazole (Maybridge, CC16408) according to the alkylation protocol to provide the title compound as a yellow oil (≥95% yield). <sup>1</sup>H NMR (CDCl<sub>3</sub>): δ 1.22 (t, 9H, *J*=7Hz), 3.58 (s, 2H), 4.21 (q, 6H, *J*=7Hz), 7.42 (d, 2H, *J*=8.25Hz), 7.92 (d, 2H, *J*=8.25Hz), 8.61 (s, 1H).

2-(4-(1,2,3-thiadiazol-4-yl)benzyl)malonic acid **38j**

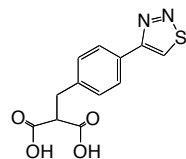

**38j**

Prepared from triester **37j** according to the saponification protocol to provide the title compound as a pale yellow solid (70% yield). <sup>1</sup>H NMR (MeOH d<sub>4</sub>): δ 3.23 (d, 2H, *J*=7.75Hz), 3.71 (t, 1H, *J*=7.75Hz), 7.40 (d, 2H, *J*=8.25Hz), 7.99 (d, 2H, *J*=8.25Hz), 9.14 (s, 1H). <sup>13</sup>C NMR (MeOH d<sub>4</sub>): δ 34.18, 53.39, 126.99, 129.23, 129.33, 131.04, 139.85, 162.43, 170.92. HRMS *m/z* for C<sub>12</sub>H<sub>11</sub>N<sub>2</sub>O<sub>4</sub>S (M+H<sup>+</sup>)<sup>+</sup>, calcd 279.0440, found 279.0434.

Triethyl 2-(4-(1*H*-pyrrol-1-yl)phenyl)ethane-1,1,1-tricarboxylate **37k**

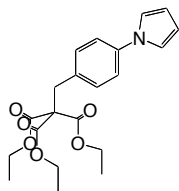

**37k**

Prepared from 1-[4-(Bromomethyl)phenyl]-1*H*-pyrrole (Maybridge, CC25508) according to the alkylation protocol to provide the title compound as a yellow oil ( $\geq 95\%$  yield).  $^1\text{H}$  NMR ( $\text{CDCl}_3$ ):  $\delta$  1.21 (t, 9H,  $J=7.25\text{Hz}$ ), 3.52 (s, 2H), 4.20 (q, 6H,  $J=7.25\text{Hz}$ ), 6.31 (m, 2H), 7.04 (m, 2H), 7.29 (m, 4H).

2-(4-(1*H*-pyrrol-1-yl)benzyl)malonic acid **38k**

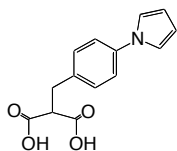

**38k**

Prepared from triester **37k** according to the saponification protocol to provide the title compound as a pale yellow solid (84% yield).  $^1\text{H}$  NMR ( $\text{MeOH } d_4$ ):  $\delta$  3.17 (d, 2H,  $J=8\text{Hz}$ ), 3.65 (t, 1H,  $J=8\text{Hz}$ ), 6.25 (m, 2H), 7.14 (m, 2H), 7.35 (m, 4H).  $^{13}\text{C}$  NMR ( $\text{MeOH } d_4$ ): 33.76, 53.56, 109.80, 109.84, 118.51, 119.53, 119.55, 129.70, 129.74, 135.53, 139.32, 170.94. HRMS  $m/z$  for  $\text{C}_{14}\text{H}_{14}\text{NO}_4$  ( $\text{M}+\text{H}^+$ ) $^+$ , calcd 260.0923, found 260.0908.

triethyl 2-(4-(1-methyl-1*H*-pyrazol-3-yl)phenyl)ethane-1,1,1-tricarboxylate **37l**

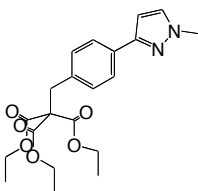

**37l**

Prepared from 3-[4-(chloromethyl)phenyl]-1-methyl-1*H*-pyrazole (Maybridge, CC23824) according to the alkylation protocol to provide the title compound as a yellow oil ( $\geq 95\%$  yield).  $^1\text{H}$  NMR ( $\text{CDCl}_3$ ):  $\delta$  1.20 (t, 9H,  $J=7.25\text{Hz}$ ), 3.51 (s, 2H), 3.93 (s, 3H), 4.19 (q, 6H,  $J=7.25\text{Hz}$ ), 6.49 (d, 1H,  $J=2.25\text{Hz}$ ), 7.28 (d, 2H,  $J=8\text{Hz}$ ), 7.65 (d, 2H,  $J=8\text{Hz}$ ), 7.99 (s, 1H).

2-(4-(1-methyl-1*H*-pyrazol-3-yl)benzyl)malonic acid **38l**

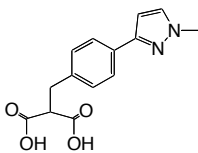

**38l**

Prepared from triester **37l** according to the saponification protocol to provide the title compound as a pale yellow solid (94% yield).  $^1\text{H}$  NMR ( $\text{MeOH } d_4$ ):  $\delta$  3.16 (d, 2H,  $J=7.75\text{Hz}$ ), 3.64 (t, 1H,  $J=7.75\text{Hz}$ ), 3.88 (s, 3H), 6.55 (d, 1H,  $J=2.25\text{Hz}$ ), 7.26 (d, 2H,  $J=8\text{Hz}$ ), 7.54 (d, 1H,  $J=2.25\text{Hz}$ ), 7.65 (d, 2H,  $J=8\text{Hz}$ ).  $^{13}\text{C}$  NMR ( $\text{MeOH } d_4$ ):  $\delta$  34.17, 37.37, 53.53, 102.41, 125.26, 128.77, 128.80, 131.51, 132.07, 137.93, 151.37, 171.02. HRMS  $m/z$  for  $\text{C}_{14}\text{H}_{15}\text{N}_2\text{O}_4$  ( $\text{M}+\text{H}^+$ ) $^+$ , calcd 275.1032, found 275.1020.

Triethyl 2-(4-(5-methyl-1,2,4-oxadiazol-3-yl)phenyl)ethane-1,1,1-tricarboxylate **37m**

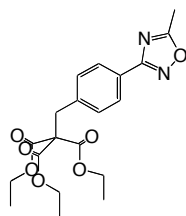

**37m**

Prepared from 3-[4-(Bromomethyl)phenyl]-5-methyl-1,2,4-oxadiazole (Maybridge, CC34808) according to the alkylation protocol to provide the title compound as a yellow oil ( $\geq 95\%$  yield).  $^1\text{H}$  NMR ( $\text{CDCl}_3$ ):  $\delta$  1.22 (t, 9H,  $J=7\text{Hz}$ ), 2.64 (s, 3H), 3.58 (s, 2H), 4.20 (q, 6H,  $J=7\text{Hz}$ ), 7.39 (d, 2H,  $J=8.25\text{Hz}$ ), 7.93 (d, 2H,  $J=8.25\text{Hz}$ ).

## 2-(4-(5-methyl-1,2,4-oxadiazol-3-yl)benzyl)malonic acid **38m**

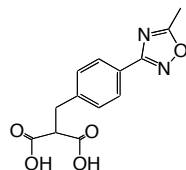

**38m**

Prepared from triester **37m** according to the saponification protocol to provide the title compound as a pale yellow solid (89% yield).  $^1\text{H}$  NMR (MeOH  $d_4$ ):  $\delta$  2.64 (s, 3H), 3.22 (d, 2H,  $J=7.75\text{Hz}$ ), 3.69 (t, 1H,  $J=7.75\text{Hz}$ ), 7.40 (d, 2H,  $J=8\text{Hz}$ ), 7.94 (d, 2H,  $J=8.25\text{Hz}$ ).  $^{13}\text{C}$  NMR (MeOH  $d_4$ ):  $\delta$  10.62, 34.26, 53.22, 124.92, 126.90, 129.16, 142.07, 167.82, 170.79, 177.28. HRMS  $m/z$  for  $\text{C}_{13}\text{H}_{13}\text{N}_2\text{O}_5$  ( $\text{M}+\text{H}^+$ ) $^+$ , calcd 277.0824, found 277.0831.

### Solid phase synthesis general procedure on Rink amide PA Synphase lantern

Standard Fmoc methodology was used to build amino acids sequences. Lanterns were first swelled in DCM for 15min at room temperature. Fmoc deprotection was performed with piperidine 20% in DMF under microwave irradiation (3x3min, 60°C, 25W). Lanterns were then washed with DMF (2x5min) and DCM (2x5min). After a pre-activation mixing protocol (10 equiv of Fmoc-AA-OH, 10 equiv of Cl-HOBt and 10 equiv of DIC in anhydrous DMF, 5min, room temperature), lanterns were then immersed in the coupling solution and coupling reaction was performed under microwave irradiation (10min, 60°C, 25W). This operation was repeated twice. This cycle of Fmoc deprotection/ amino acid coupling step was repeated once for pseudodipeptides synthesis.

### Malonic building block incorporation

Malonic building blocks **38** (5 equiv) were pre-activated in presence of DIC (5eq) and Cl-HOBt (5eq) in anhydrous DMF (pre-activation protocol, 5min, room temperature) and lanterns were then immersed in coupling solution. Reaction was carried out under microwave irradiation (10min, 60°C, 25W). Lanterns were then washed with DMF (2x5min) and DCM (2x5min).



### Dipolar cycloaddition on solid support access to pseudopeptides 5 to 10

Isoxazole pathway (5-9): Isoxazole derivatives were obtained according to one-pot method<sup>1</sup> that has been slightly modified. Corresponding oxime (10eq) were dissolved in anhydrous DCM and two drops of pyridine were added. NCS (10 eq) was added at room temperature and after 10 min the resulting mixture was stirred for 1h at 45°C and then cooled down to room temperature. Lanterns were immersed and Et<sub>3</sub>N (20eq) was added. The reaction mixture was gently stirred for 12h at room temperature. This operation was repeated three times. Lanterns were then washed with DMF (2x5min) and DCM (2x5min).

1,4 triazole pathway (10): Lanterns were immersed in reaction mixture containing phenyl azide (10eq), copper iodide dissolved in THF (0,18M estimated concentration, 2eq) and Et<sub>3</sub>N (50eq). Dipolar cycloaddition was carried out under microwave irradiation in a sealed reactor (80°C, 10 min, 300W). Lanterns were then washed with THF (1x5min), 0.1M solution of EDTA (1x5min) water (1x5min) DMF (2x5min) and DCM (2x5min).

### Suzuki coupling step on solid support, access to pseudopeptides 15-23, 26 and 32-36.

Lanterns were immersed in a mixture of boronic acid derivative (10eq, 0,2M DMF solution), potassium carbonate (10eq, 0,16M aqueous solution) and Pd (PPh<sub>3</sub>)<sub>4</sub> (1eq, 0,08M DMF solution). Cross coupling reaction was then carried out under microwave irradiation in a sealed reactor (80°C, 5min, 300W). Lanterns were then washed with DMF (2x5min) and DCM (2x5min).

### Cleavage, purification and storage.

Each synthesized pseudo peptides were cleaved from lanterns. This cleavage is first performed in TFA/TIS/H<sub>2</sub>O (95/2,5/2,5). After gentle stirring at room temperature for 1h, lanterns were then transferred into a fresh TFA/DCM (1/1) solution and stirred for 30 minutes at room temperature. Combined cleavage solutions were then evaporated and crude pseudo peptides were taken in a (A)/(B): 1/1 solution. RP-HPLC separations were performed on AIT C18 Kromasil (250x20 mm, flow rate=3mL.min<sup>-1</sup>, UV detection at 230 nm) using a gradient as followed: 0 to 40 min: 0 to 100% (B). After lyophilization, each pure pseudo peptide is stored at +4°C in a water/Ethanol: 1/1 solution after neutralization with 1M NaHCO<sub>3</sub> aqueous solution. Determination of pseudo peptide concentration is performed by Amino acid composition analysis and UV measurements.

### **3) Supplemental references**

1- Diastereoselective solution and multipin-based combinatorial array synthesis of a novel class of potent phosphinic metalloprotease inhibitors. Makaritis A, Georgiadis D, Dive V, Yiotakis A. Chemistry. 2003 May 9;9(9):2079-94.
